# Supplementary material
Source: publisher figshare collection journal article supplement (https://tandf.figshare.com/articles/dataset/_/8965937)
Supplement: Supplementary file 1 [file 1]

**Group 1 Action Plan**

| **Why APT** | **Who?** | **How?** |
| --- | --- | --- |
| To take care of children with disabilities in the target area (Area 1) | - PN (workshop) - JW (workshop) - BM (workshop) - DC (main centre)   Managers   - MM (community leader) - DM (co-ordinator) | Assess the need in consultation with PT’s, OT’s and parents, community volunteers and other stake holders |
| To prevent/reduce incidences of secondary deformities | Make use of the already existing structures i.e. workshop, trained human resource and main centre |
| To enhance the quality of services offered by the community programme for people with disabilities e.g. PT and OT and involve core members serving in the community | Create awareness on what we do/importance of APT |
| It its economical and therefore accessible by families of low income levels | Train others on APT |
| Assistive devices are portable and light |
